# Supplementary material
Source: MDPI journal article supplement (https://www.mdpi.com/2673-4141/5/1/8)

## Supplementary material

### Effect of Cr/Mn addition in TiVNb on hydrogen sorption properties : thermodynamics and phase transition study

Anis Bouzidi<sup>1</sup>, Erik Elkaim<sup>2</sup>, Vivian Nassif<sup>3</sup>, Claudia Zlotea<sup>1\*</sup>

<sup>1</sup> Univ Paris Est Creteil, CNRS, ICMPE, UMR 7182, 2 rue Henri Dunant, 94320 Thiais, France

<sup>2</sup> Synchrotron SOLEIL, L'Orme des Merisiers, Saint-Aubin, 91192 Gif sur Yvette Cedex, France

<sup>3</sup> University Grenoble Alpes, CNRS, Institut Néel, 38000 Grenoble, France

\* Correspondence: claudia.zlotea@cnrs.fr

Figure S1. The variation of the background level between 5-6° (2 $\theta$ ) in the neutron diffraction pattern as fonction of temperature.

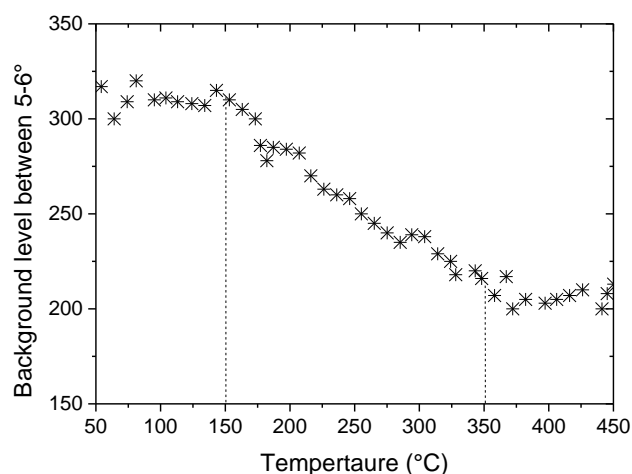

Supplement: s1 [file s1]
